# Supplementary material for: Engineering polymeric composite particles by emulsion-templating: thermodynamics versus kinetics
Source: Royal Society of Chemistry journal article supplement (doi:10.1039/c3sm51176f), 2013-01-01
Supplement: c3sm51176f.pdf [file c3sm51176f.pdf]

### Supplementary Information

## Engineering polymeric composite particles by emulsion-templating: Thermodynamics versus Kinetics

Tiantian Kong<sup>a,b</sup>, Zhou Liu<sup>a</sup>, Yang Song<sup>a</sup>, Liqiu Wang<sup>\*a,b</sup>, Ho Cheung Shum<sup>\*a,c</sup>

| Interfacial tension (mN/m)                      | PVA with 10wt% in DI water |
|-------------------------------------------------|----------------------------|
| Dichloromethane                                 | 3                          |
| 0.04 g/ml PLGA in dichloromethane               | 2.7                        |
| 0.4 g/ml PLGA in dichloromethane                | 2.7                        |
| 2 wt% Dow Corning 749 fluid in dichloromethane  | 3                          |
| 50 wt% Dow Corning 749 fluid in dichloromethane | 3                          |

**Table S1.** Interfacial tension between the different emulsion phases, as measured by a tensiometer (Model S-59951-25, Cole-Parmer) (Interfacial tension between Dichloromethane and DI water is 25.2 mN/m)

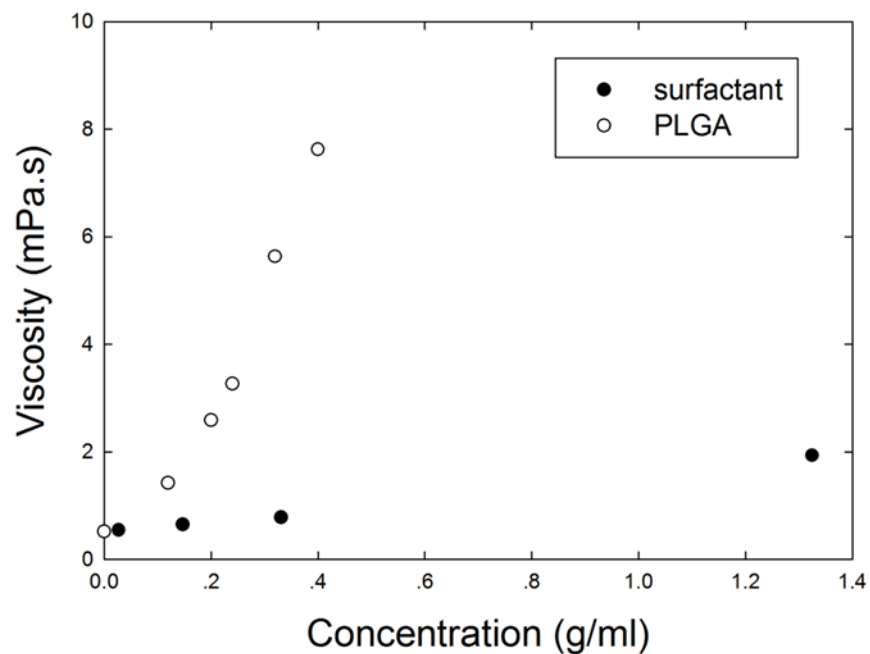

Figure S2. Plot of the viscosities of PLGA-in-dichloromethane and surfactant-in-dichloromethane with systematically varied concentrations. The viscosity of the two phases is measured by an Ubbelodhe viscometer, Viscoclock. It is an electronic time-measuring unit that determines the time elapsed due to fluid flow, which is proportional to dynamic viscosity.

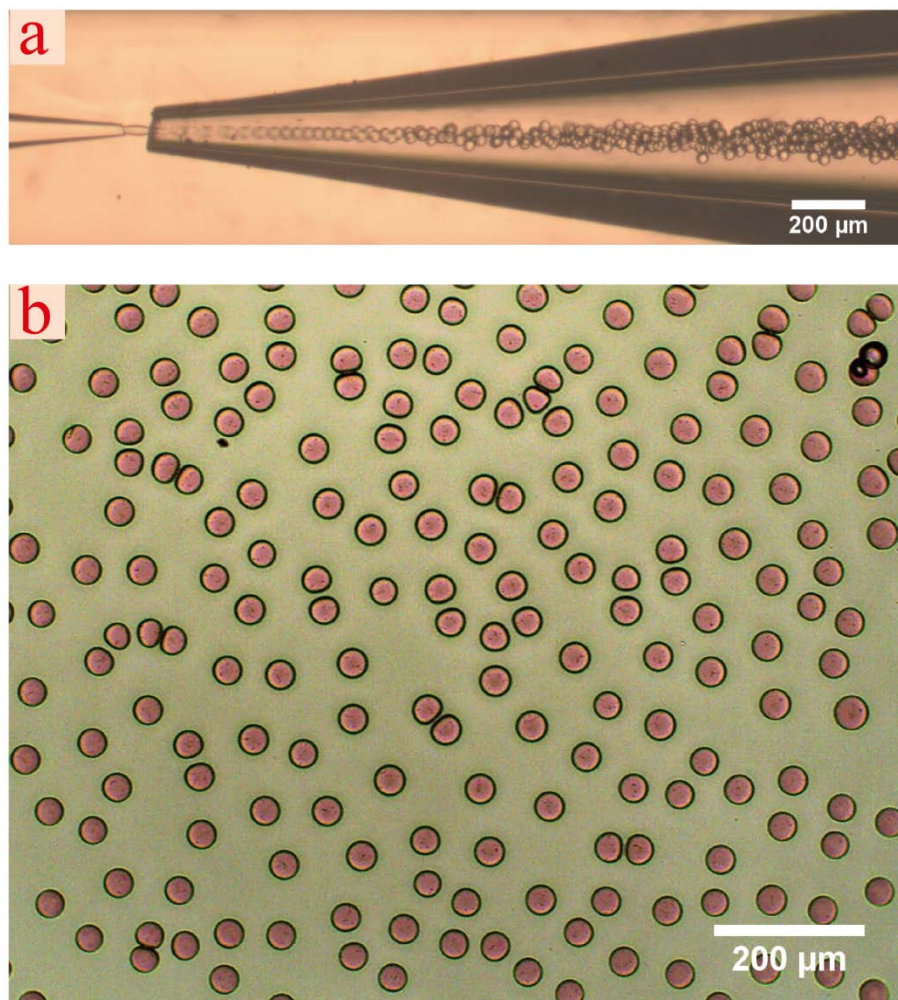

**Figure S3.** a ) Optical microscopic image showing the generation of single emulsion droplets, with the dispersed phase being 2 wt% Dow corning 749 fluid in dichloromethane and continuous phase being PVA 10 wt% in DI water; b) Optical microscopic image of microcapsules formed by precipitation of surfactants, Dow corning 749 fluid, at the O/W interface.

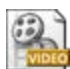

v.wmv

**Video S4.** Video captured with an optical microscope demonstrating the formation of capsules by the precipitation of surfactants. (real time)

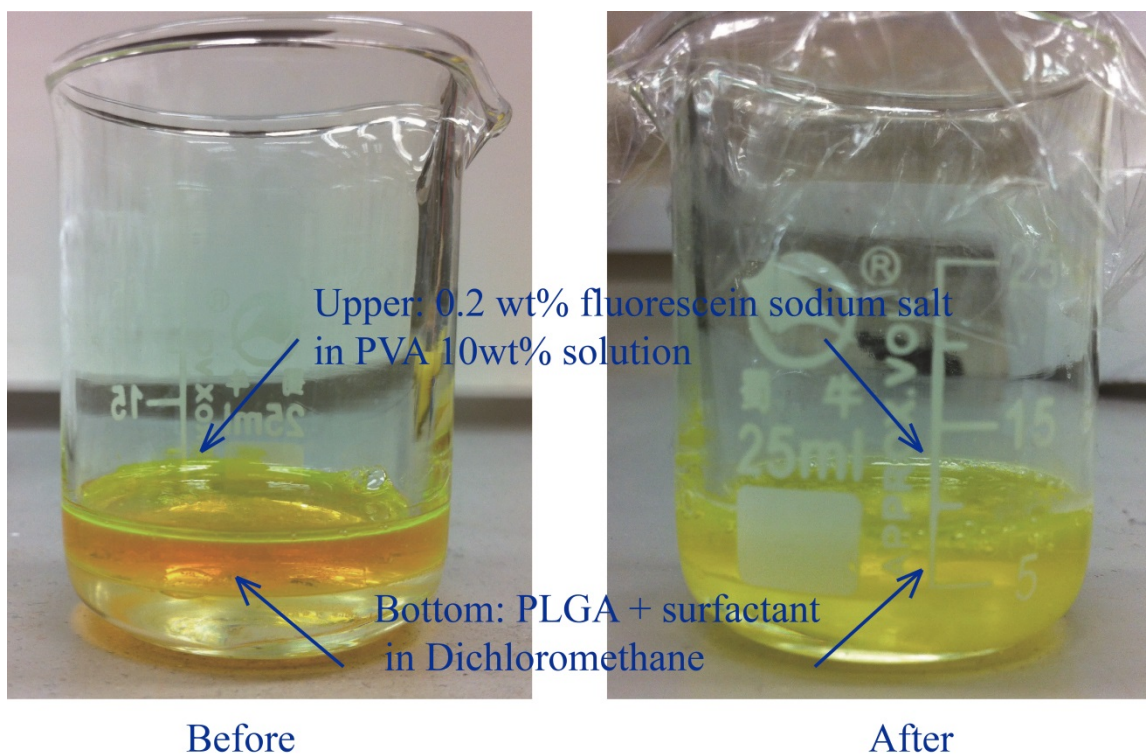

**Figure S5.** Photographs demonstrating the selective solubility of the fluorescein sodium salt. The salt in top layer can diffuse through the O/W interface and enters the bottom phase. (The density of DCM is  $1.325\text{g/cm}^{-3}$ )
